# Supplementary material for: Enhanced activity, durability and anti-poisoning property of Pt/W18O49 for methanol oxidation with a sub-stoichiometric tungsten oxide W18O49 support
Source: Royal Society of Chemistry journal article supplement (doi:10.1039/c4ta04220d), 2014-01-01
Supplement: c4ta04220d1.pdf [file c4ta04220d1.pdf]

## Supporting information (SI)

### Enhanced Activity, Durability and Anti-poisoning property of Pt/W<sub>18</sub>O<sub>49</sub> for Methanol Oxidation with a Sub-stoichiometric Tungsten Oxide W<sub>18</sub>O<sub>49</sub> Support

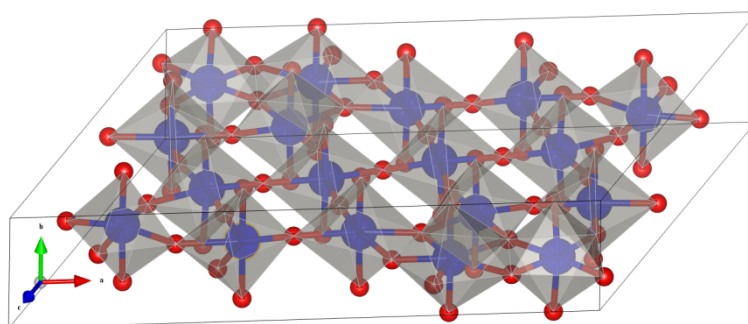

**Fig. S1** Crystal structure of the monoclinic W<sub>18</sub>O<sub>49</sub>.

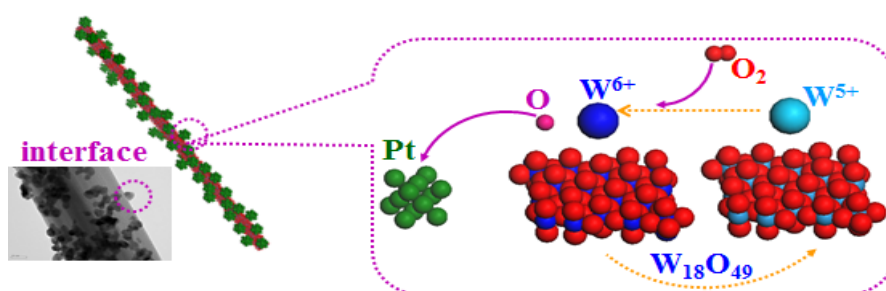

**Fig. S2** Mechanism of the oxygen buffering effect in Pt/W<sub>18</sub>O<sub>49</sub>.

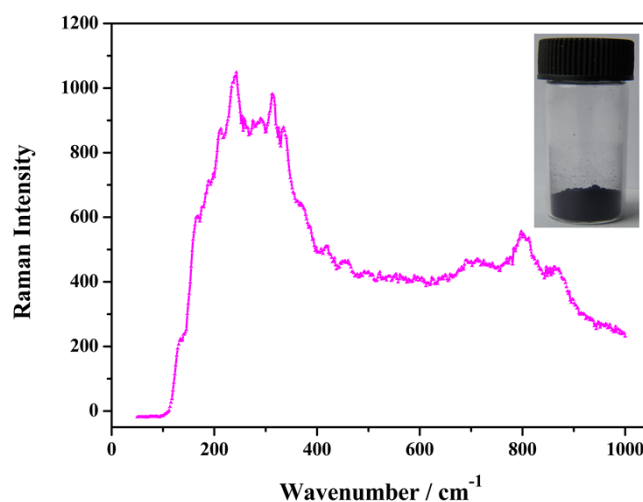

**Fig. S3** Raman spectrum of the W<sub>18</sub>O<sub>49</sub> nanowire arrays.

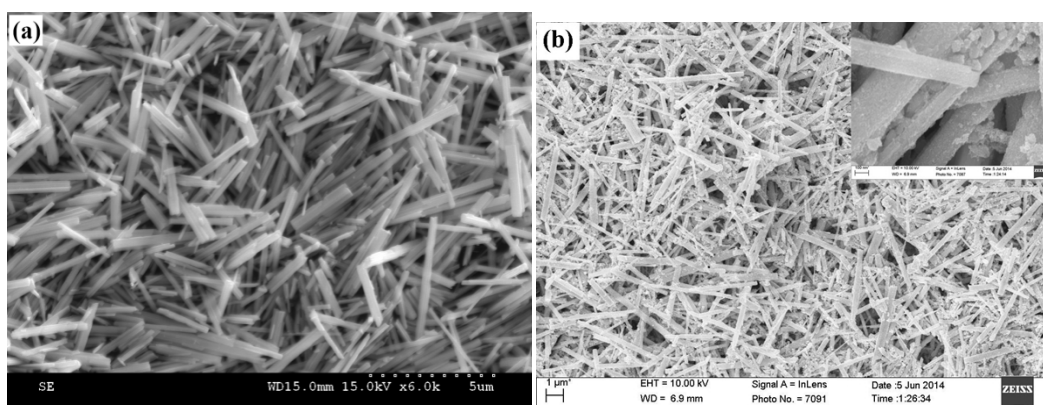

**Fig. S4** SEM image of the (a) W<sub>18</sub>O<sub>49</sub> NRs and (b) Pt/W<sub>18</sub>O<sub>49</sub>. High-magnification SEM image of Pt/W<sub>18</sub>O<sub>49</sub> is shown in the inset of (b).

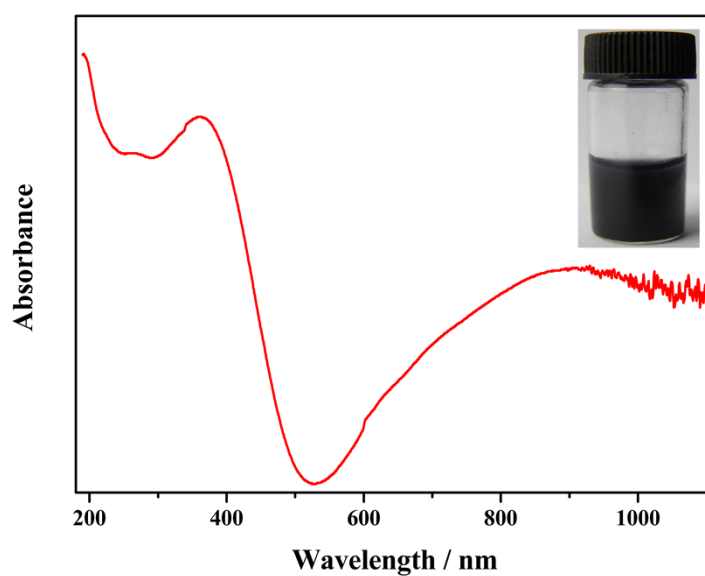

**Fig. S5** Ultraviolet/visible (UV/Vis) absorption spectrum of the W<sub>18</sub>O<sub>49</sub> NRs.

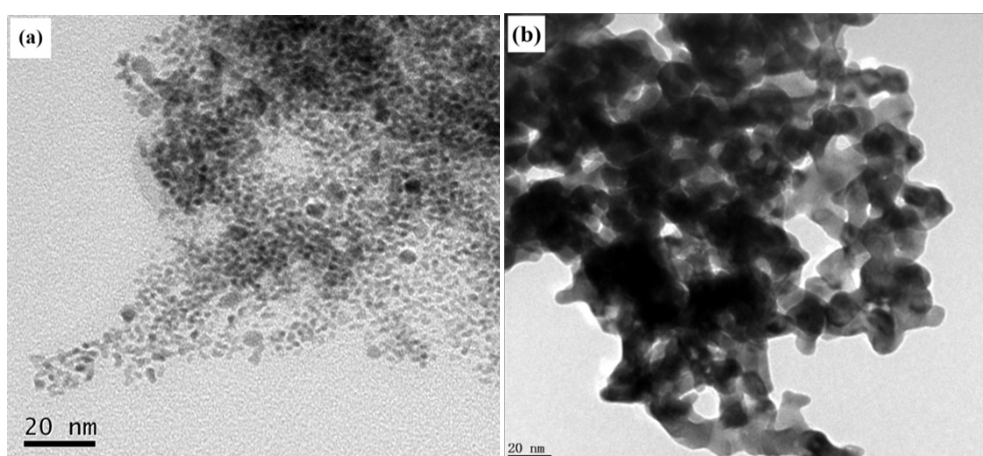

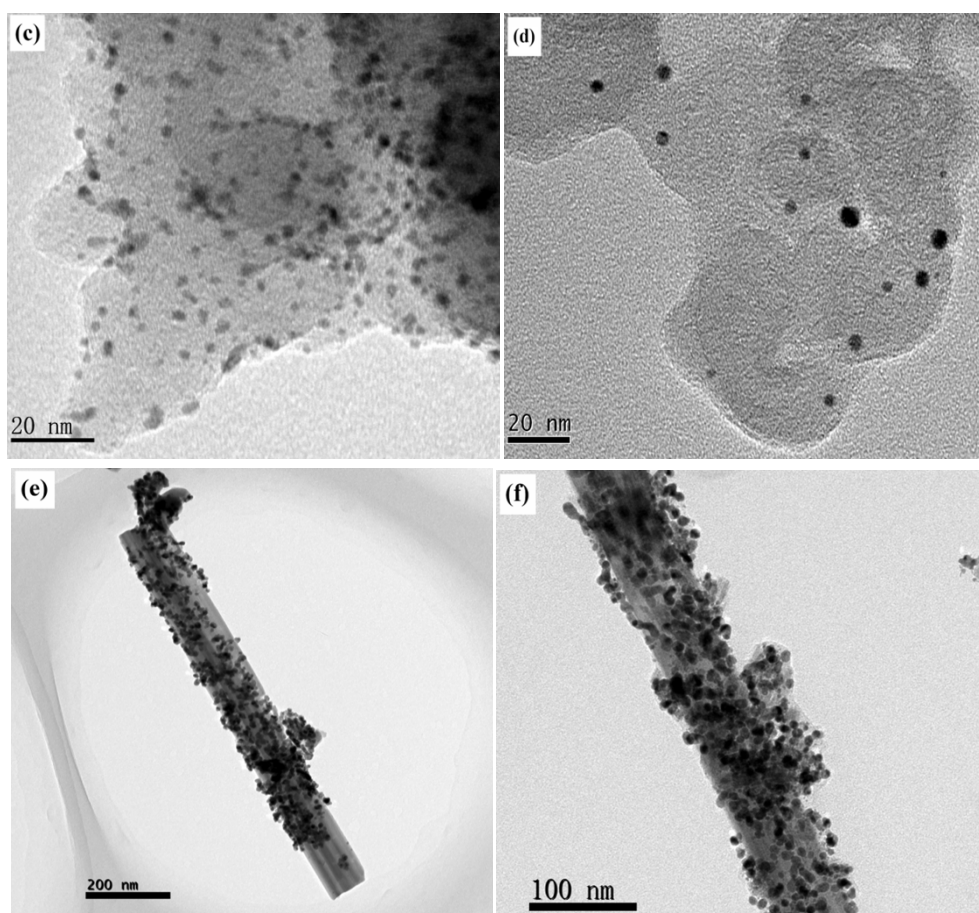

**Fig. S6** TEM images of Pt-black: (a) dispersion before the durability test and (b) aggregation/Oswald ripening after a 5000-cycle durability test. Pt/C: (c) dispersion before the durability test and (d) dissolution/aggregation/Oswald ripening after a 5000-cycle durability test. Pt/W<sub>18</sub>O<sub>49</sub>: (e) dispersion before the durability test and (f) dispersion almost unchanged after a 5000-cycle durability test.

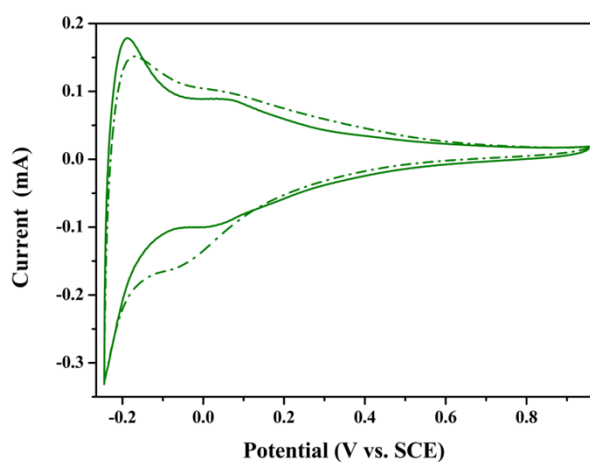

**Fig. S7** ADT recorded in an Ar-purged 0.5 M H<sub>2</sub>SO<sub>4</sub> with a sweep rate of 100 mV·s<sup>-1</sup> of the W<sub>18</sub>O<sub>49</sub> NRs support (solid for the 1<sup>st</sup> cycle and dotted for the 5000<sup>th</sup> cycle).

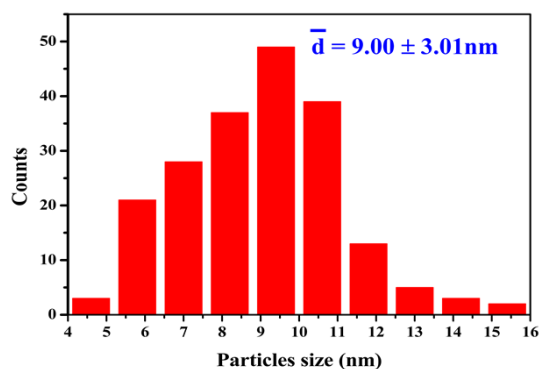

**Fig. S8** The corresponding particle size distribution obtained by counting 200 Pt particles of Pt/W<sub>18</sub>O<sub>49</sub> after a 5000-cycle ADT in Fig. S6f.

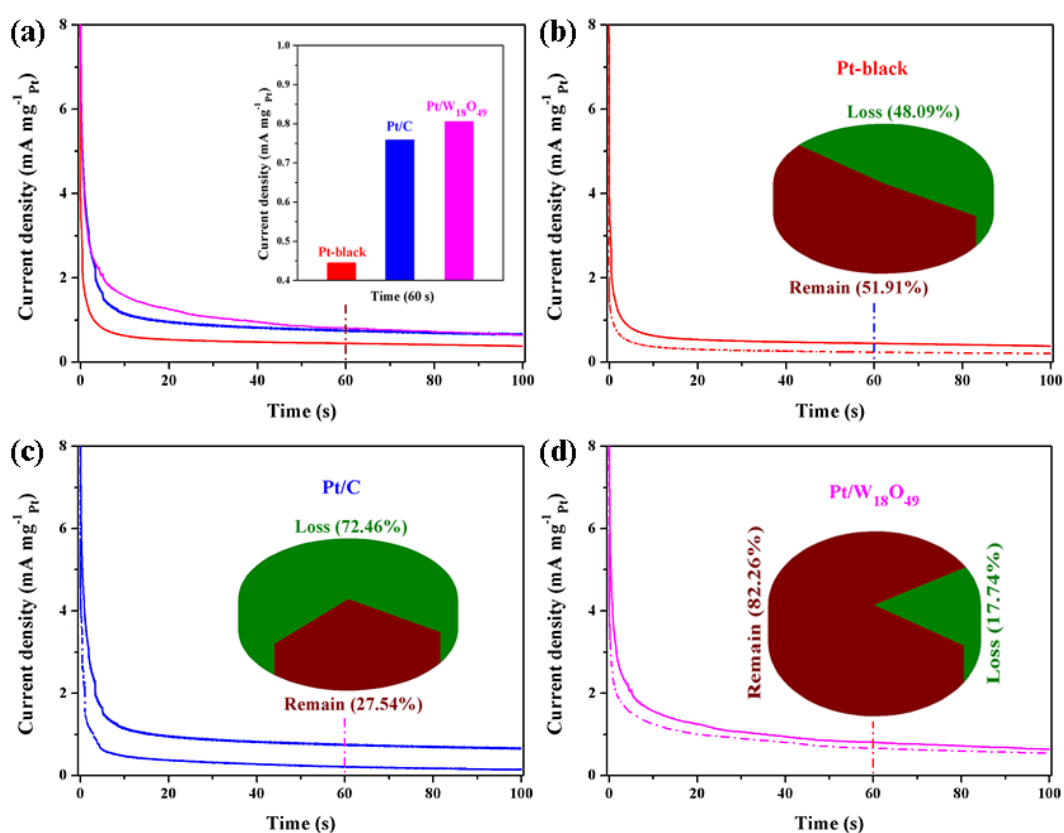

**Fig.S9** Chronoamperometry measurements were performed in a 0.5 M H<sub>2</sub>SO<sub>4</sub> and 0.5 M CH<sub>3</sub>OH solution at 0.359 V (VS. SCE) after a 50-cycle CV activity in an Ar-purged 0.5 M H<sub>2</sub>SO<sub>4</sub> solution with a sweep rate of 100 mV·s<sup>-1</sup>. (a) Transient current density curves of methanol oxidation by chronoamperometry experiments for Pt/W<sub>18</sub>O<sub>49</sub> (purple curve), Pt-black (red curve) and Pt/C (blue curve), the potential dependence of the steady-state current density recorded at 60 s is shown in inset. Chronoamperometry curves before and after a 5000-cycle ADT for Pt-black (red solid

curve for the 1st cycle and dotted curve for the 5000<sup>th</sup> cycle in (b)) , Pt/C (blue solid curve for the 1st cycle and dotted curve for the 5000<sup>th</sup> cycle in (c)), Pt/W<sub>18</sub>O<sub>49</sub> (purple solid curve for the 1st cycle and dotted curve for the 5000<sup>th</sup> cycle in (d)), inset is the loss of transient current density at 60 s after the ADT of the three catalysts, respectively.

**Table S1** Binding energy and atomic content (%) of different W 4f valence states (W<sup>5+</sup> and W<sup>6+</sup>) obtained from the W 4f XPS spectra.

| Sample                                 |                | W <sup>5+</sup> | W <sup>6+</sup> |
|----------------------------------------|----------------|-----------------|-----------------|
| W <sub>18</sub> O <sub>49</sub>        | Binding energy | 33.90           | 35.64           |
|                                        | Content        | 26.22           | 73.78           |
| Pt/W <sub>18</sub> O <sub>49</sub>     | Binding energy | 34.17           | 35.70           |
|                                        | Content        | 13.33           | 86.67           |
| Pt/W <sub>18</sub> O <sub>49</sub> -CV | Binding energy | 34.14           | 36.27           |
|                                        | Content        | 27.70           | 72.30           |

**Table S2** Comparison of the electrochemical activities of the Pt/W<sub>18</sub>O<sub>49</sub>, Pt-black and Pt/C catalysts.

|                                    | onset potential<br>(V) |       | ECSA                                      |                  | Specific Activity<br>(mA cm <sup>-2</sup> ) |                |                                |                |                |
|------------------------------------|------------------------|-------|-------------------------------------------|------------------|---------------------------------------------|----------------|--------------------------------|----------------|----------------|
|                                    | CH <sub>3</sub> OH     | HCOOH | ECSA<br>(m <sup>2</sup> g <sup>-1</sup> ) | ECSA<br>Loss (%) | CH <sub>3</sub> OH                          |                | HCOOH                          |                |                |
|                                    |                        |       |                                           |                  | I <sub>f</sub>                              | E <sub>f</sub> | I <sub>f</sub> /I <sub>b</sub> | I <sub>f</sub> | E <sub>f</sub> |
| Pt-black                           | 0.1                    | 0.01  | 23.28                                     | 49.50            | 0.81                                        | 0.665          | 0.99                           | 0.29           | 0.648          |
| Pt/C                               | 0.1                    | 0.01  | 86.46                                     | 85.25            | 0.63                                        | 0.689          | 0.79                           | 0.27           | 0.651          |
| Pt-W <sub>18</sub> O <sub>49</sub> | 0.1                    | 0.01  | 37.05                                     | 27.12            | 1.14                                        | 0.654          | 1.12                           | 0.44           | 0.656          |

**Table S3** Comparison of the chronoamperometry activities of the Pt/W<sub>18</sub>O<sub>49</sub>, Pt-black and Pt/C catalysts at 0.359 V (Vs. SCE) before and after a 5000-cycle durability test at 60 s.

|                                                         | Pt-black | Pt/C  | Pt-W <sub>18</sub> O <sub>49</sub> |
|---------------------------------------------------------|----------|-------|------------------------------------|
| 1 <sup>th</sup> (mA mg <sup>-1</sup> <sub>Pt</sub> )    | 0.445    | 0.759 | 0.806                              |
| 5000 <sup>th</sup> (mA mg <sup>-1</sup> <sub>Pt</sub> ) | 0.231    | 0.209 | 0.663                              |
| Loss (%)                                                | 48.09    | 72.46 | 17.74                              |
